# Supplementary material for: Direct induction of ramified microglia-like cells from human monocytes: Dynamic microglial dysfunction in Nasu-Hakola disease
Source: PubMed Central journal article supplement — Sci Rep. 2014 May 14;4:4957. doi: 10.1038/srep04957 (PMC4019954; doi:10.1038/srep04957), 2014-05-14
Supplement: srep04957-s1.pdf [file srep04957-s1.pdf]

### **Supplementary Data**

(Masahiro Ohgidani, Takahiro A. Kato, Daiki Setoyama, Noriaki Sagata, Ryota Hashimoto, Kazue Shigenobu, Tetsuhiko Yoshida, Kohei Hayakawa, Norihiro Shimokawa, Daisuke Miura, Hideo Utsumi, Shigenobu Kanba: Direct induction of ramified microglia-like cells from human monocytes: Dynamic microglial dysfunction in Nasu-Hakola disease. *Scientific Reports*)

Supplementary Figure S1

**A**

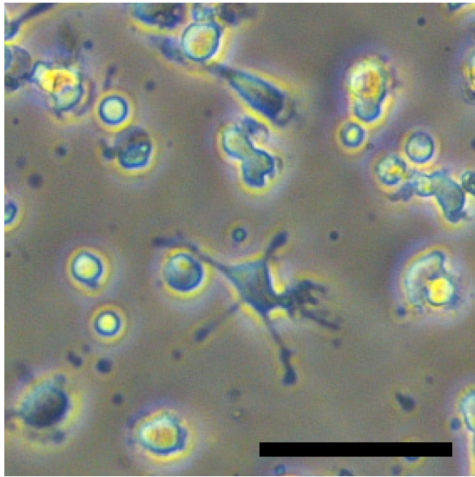

**B**

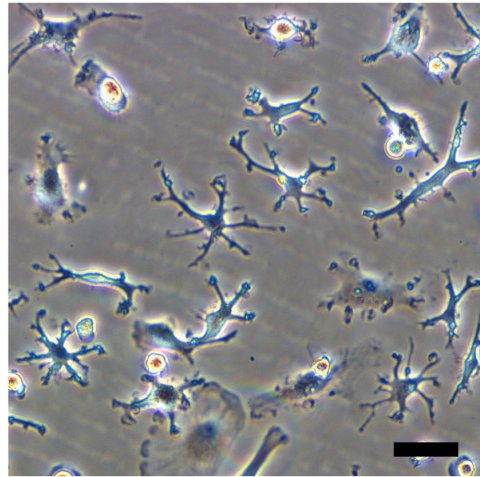

Supplementary Figure S1. The morphology of iMG cells. In DAY 3, branched cells were observed after the treatment of GM-CSF and IL-34 (A). The iMG cells were survived more than 30 days. The morphology of iMG cells at DAY30 (B). Scale bar, 50  $\mu$ m.

## Supplementary Figure S2

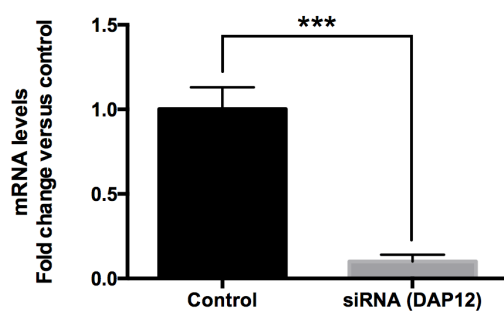

Supplementary Figure S2. DAP12 of the iMG cells from healthy control was successfully downregulated by siRNA (n = 8). \*\*\*P < 0.001. Error bars, SEM.

Supplementary Table S1. qRT-PCR primer sequences used in this study.

| Primer           | Sequences                         |
|------------------|-----------------------------------|
| HLA-DR-F         | 5'-TTCAGGAATCAGAAAGGACACTC-3'     |
| HLA-DR-R         | 5'-TCTGCATTTTCAGCTCAGGAA-3'       |
| CD45-F           | 5'-AGTCAAAGTTATTGTTATGCTGACAGA-3' |
| CD45-R           | 5'-TGCTTTCCTTCTCCCCAGTA-3'        |
| TNF- $\alpha$ -F | 5'-CAGCCTCTTCTCCTTCCTGAT-3'       |
| TNF- $\alpha$ -R | 5'-GCCAGAGGGCTGATTAGAGA-3'        |
| CCR7-F           | 5'-GGGGAAACCAATGAAAAGC-3'         |
| CCR7-R           | 5'-ACCTCATCTTGACACAGGCATA-3'      |
| CCL18-F          | 5'-ATGGCCCTCTGCTCCTGT-3'          |
| CCL18-R          | 5'-AATCTGCCAGGAGGTATAGACG-3'      |
| CD200R-F         | 5'-TGGGATTCATTTGGTTGTTG-3'        |
| CD200R-R         | 5'-CAACTGGAGTAGATTCTGTTTTATTCA-3' |
| DAP12-F          | 5'-GAGACCGAGTCGCCTTATCA-3'        |
| DAP12-R          | 5'-CTGTGTGTTGAGGTCGCTGT-3'        |
| TREM2-F          | 5'-TCTGAGAGCTTCGAGGATGC-3'        |
| TREM2-R          | 5'-GGGGATTTCTCCTTCCAAGA-3'        |
